# Supplementary material for: A single-component yet multifunctional tongue-mimicking sensor array for upconversion fluorescence biosensing
Source: Royal Society of Chemistry journal article supplement (doi:10.1039/d0an01641a), 2020-01-01
Supplement: d0an01641a1.pdf [file d0an01641a1.pdf]

Supporting information for

**A Single-Component yet Multifunctional Tongue-Mimic Sensor Array for  
Upconversion Fluorescent Biosensing**

Qian-Qian Wang, Zheng-Qi Fang, Ya-Ting Wu, Min Zhang\*, Guoyue Shi\*

School of Chemistry and Molecular Engineering, Shanghai Key Laboratory for Urban Ecological Processes and Eco-Restoration,  
Engineering Research Center for Nanophotonics and Advanced Instrument, Ministry of Education, East China Normal University, 500  
Dongchuan Road, Shanghai 200241, China. Email: [mzhang@chem.ecnu.edu.cn](mailto:mzhang@chem.ecnu.edu.cn); [gyshi@chem.ecnu.edu.cn](mailto:gyshi@chem.ecnu.edu.cn).

**Contents:**

|                                      |           |
|--------------------------------------|-----------|
| <b>1. Experimental Section.....</b>  | <b>S2</b> |
| <b>2. Supplementary Figures.....</b> | <b>S4</b> |
| <b>Fig.S1 .....</b>                  | <b>S4</b> |
| <b>Fig.S2 .....</b>                  | <b>S4</b> |
| <b>Fig.S3 .....</b>                  | <b>S5</b> |
| <b>Fig.S4 .....</b>                  | <b>S5</b> |
| <b>Fig.S5 .....</b>                  | <b>S5</b> |
| <b>Fig.S6 .....</b>                  | <b>S6</b> |
| <b>3. References.....</b>            | <b>S6</b> |

## 1. Experimental Section

**Materials and instruments.** Rare earth oxides ( $\text{Yb}_2\text{O}_3$ ,  $\text{Tm}_2\text{O}_3$ ,  $\text{Gd}_2\text{O}_3$ ,  $\text{Yb}_2\text{O}_3$ ,  $\text{Er}_2\text{O}_3$ , and  $\text{Nd}_2\text{O}_3$ , 99.99%) were purchased from Diyang Chemical Co. Ltd. (Shanghai, China). Yttrium oxide ( $\text{Y}_2\text{O}_3$ , 99.99%), glutathione, and D-cysteine ( $\text{D-Cys}$ ) hydrochloride monohydrate were ordered from Aladdin Reagent Co. Ltd. (Shanghai, China). Oleic acid (OA, 90%), 1-octadecene (ODE, 90%), dopamine hydrochloride (DA) and homocysteine (Hcys) were purchased from Sigma-Aldrich (St. Louis, MO). Oleyl amine (OM, 90%), L-cysteine ( $\text{L-Cys}$ ) and ascorbic acid (AA) were bought from Adamas Reagent Co. Ltd. (Shanghai, China). Trifluoroacetic acid (TFA) was ordered from Macklin Biochemical Co. Ltd. (Shanghai, China). Sodium trifluoroacetic was obtained from Alfa Aesar. Then,  $10\times\text{Tris-HCl}$  buffer (100 mM, pH 8.5) was prepared using metal-free reagents in ultrapure water.

The upconversion fluorescence measurements were performed using a fluorescence spectrophotometer (Hitachi F7000, Japan) assembled with 980- and 808-nm laser accessory. UV-vis absorption measurements were obtained on the TECAN microplate reader. Transmission electron microscopy (TEM) photos were taken by a JEOL-2100F microscope (Japan). Fourier transform infrared spectroscopy (FTIR) spectroscopic measurements were obtained using a Nexus 670 optical bench (Nicolet, USA).

**Synthesis of the Multi-emission Ln-UCNPs.** The  $\text{NaGdF}_4\text{:Yb,Er@NaYF}_4\text{@NaYF}_4\text{:Yb,Tm@NaYbF}_4\text{:Nd@NaYF}_4$  nanoparticle was synthesized as follows:

**a. Preparation of  $\text{RE}(\text{CF}_3\text{COO})_3$  ( $\text{RE}=\text{Y, Gd, Yb, Er, Tm, and Nd}$ ).** 2 mmol of rare earth oxide was added to a 50 mL teflon reactor containing 14 mL DI water. Then a 14 mL amount of TFA was slowly added to the reactor. The reactor was highly sealed and the slurry was maintained at  $80^\circ\text{C}$  for 24 h to form a clear solution. After cooling down to room temperature, a rotary evaporator was used to remove the water and TFA. Finally, the product was recrystallized twice and kept at  $80^\circ\text{C}$  for 24 h.

**b. Synthesis of OA-capped UCNPs.** Precursors (1 mmol  $\text{CF}_3\text{COONa}$ , 0.78 mmol  $(\text{CF}_3\text{COO})_3\text{Gd}$ , 0.2 mmol  $(\text{CF}_3\text{COO})_3\text{Yb}$ , and 0.02 mmol  $(\text{CF}_3\text{COO})_3\text{Er}$ ) were added to a 100 mL three-necked flask containing 10 mmol OA, 10 mmol OM, and 20 mmol ODE. The slurry was heated to  $120^\circ\text{C}$  for 90 min to remove water and oxygen. Then, a clear solution formed and was heated to  $310^\circ\text{C}$  for 15 min. The whole heating process was under the protection of  $\text{N}_2$  atmosphere to isolate oxygen and water. After cooling down to room temperature, a 8 mL amount of ethanol was added to precipitate the nanoparticles. The final products were separated by centrifugation at 12000 rpm for 15 min. Nanoparticles were dispersed in 10 mL of cyclohexane. Then, a 5 mL amount of as-prepared nanoparticle colloidal solution, 0.5 mmol  $\text{CF}_3\text{COONa}$ , 0.39 mmol  $\text{Gd}(\text{CF}_3\text{COO})_3$ , 0.1 mmol  $\text{Yb}(\text{CF}_3\text{COO})_3$ , and 0.01 mmol of  $\text{Er}(\text{CF}_3\text{COO})_3$  and solvents (20 mmol of OA and 20 mmol of ODE) were added into the 100 mL three-necked flask to react at  $310^\circ\text{C}$  for 30 min, and aftertreatments are the same as those in the previous step. The second shell contain 2.5 mL amount of product in the first step, 1 mmol  $\text{CF}_3\text{COONa}$  and 1 mmol  $\text{Y}(\text{CF}_3\text{COO})_3$ ; the third shell is 10 mL amount of as-prepared  $\text{Er@Y}$  colloidal solution, 1 mmol  $\text{CF}_3\text{COONa}$ , 0.49 mmol  $\text{Y}(\text{CF}_3\text{COO})_3$ , 0.5 mmol  $\text{Yb}(\text{CF}_3\text{COO})_3$ , and 0.01 mmol  $\text{Tm}(\text{CF}_3\text{COO})_3$ ; the fourth shell is 5 mL amount of as-prepared  $\text{Er@Y@Tm}$  colloidal

solution, 0.5 mmol  $\text{CF}_3\text{COONa}$ , 0.25 mmol  $\text{Nd}(\text{CF}_3\text{COO})_3$ ; and the shell contain 5 mL amount of as prepared  $\text{Er@Y@Tm@Y}$  colloidal solution, 0.25 mmol  $\text{CF}_3\text{COONa}$ , 0.25 mmol  $\text{Y}(\text{CF}_3\text{COO})_3$ . The final products were collected for further characterizations.

**c.Preparation of water-dispersible ligand-free UCNPs.** The as-prepared Ln-UCNPs (200 mg) were dispersed in 20 mL DI water. The solution was acidified with 0.1 M HCl solution in order to maintain the pH at 2~3. The carboxylate group of OA ligand was protonated during this reaction. After intensely agitated overnight, the reaction was entirely finished. The aqueous solution was re-extracted with diethyl ether at least three times to remove the oleic acid and the combined organic extracts were re-extracted with water. Moreover, the combined water layers were re-extracted by diethyl ether. The ligand-free Ln-UCNPs in water layers were isolated by centrifugation after precipitation with acetone. Finally, the nanoparticles were readily dispersed in water for further use.

**Assay for Antioxidants Using Ln-UCNPs as a Single-Component Sensor Array.** First, 0.5 mg/mL UCNPs was dispersed with Tris-HCl buffer (100 mM, pH 8.5), and 100  $\mu\text{M}$  DA was added to react for 40 min under 37°C to form UCNPs@PDA. Sensitivity experiments were conducted by mixing several concentrations of GSH, Cys, Hcys or AA with DA into the above solution and incubating for 40 min. For selectivity and competitiveness assays, antioxidant mixtures were tested. They were excited at 980 nm or 808 nm, and the fluorescent spectra were recorded. The resulting responses of the sensor ( $F/F_0$ ), where  $F$  and  $F_0$  are the fluorescence intensity in the presence and absence of antioxidants, respectively, were recorded at emission peaks of 368, 484 and 550 nm. Each group had five replicates to react with UCNPs@PDA in identical conditions. The raw data matrix (3 sensor elements  $\times$  4 antioxidants  $\times$  5 repeats) was obtained. Principal component analysis (PCA) was used to process the multivariate pattern data.

**Identification of unknown samples in biofluids.** We prepared a series of complex samples by spiking different concentrations of GSH to artificial cerebrospinal fluid (aCSF): (1) 4  $\mu\text{M}$ ; (2) 8  $\mu\text{M}$ ; (3) 12  $\mu\text{M}$ ; (4) 18  $\mu\text{M}$ . Meanwhile, three test samples were prepared as a comparison: (A) 6  $\mu\text{M}$ ; (B) 10  $\mu\text{M}$ ; (C) 15  $\mu\text{M}$ . To prepare the artificial cerebrospinal fluid (aCSF) solution<sup>[1]</sup>, 124.0 mM NaCl, 2.5 mM KCl, 2.5 mM  $\text{CaCl}_2$ , 2.0 mM  $\text{MgSO}_4$ , 1.25 mM  $\text{KH}_2\text{PO}_4$ , 26 mM  $\text{NaHCO}_3$  and 11.0 mM glucose were dissolved in distilled water. In addition, 1  $\mu\text{M}$ , 3  $\mu\text{M}$ , 5  $\mu\text{M}$  and 7  $\mu\text{M}$  GSH samples were set in artificial urine with three test samples of 2  $\mu\text{M}$ , 4  $\mu\text{M}$  and 6  $\mu\text{M}$ . The artificial urine was prepared according to the literature<sup>[2]</sup>: NaCl (55 mM), KCl (67 mM),  $\text{Mg}_2\text{SO}_4$  (3.2 mM),  $\text{Ca}_2\text{SO}_4$  (2.6 mM),  $\text{Na}_2\text{SO}_4$  (29.6 mM),  $\text{Na}_2\text{HPO}_4$  (19.8 mM),  $\text{C}_4\text{H}_7\text{N}_3\text{O}$  (9.8 mM) and  $\text{CO}(\text{NH}_2)_2$  (310 mM). Both biological fluids were diluted by 10 times using deionized water.

**Measurement of  $\text{p-Cys}$  by DTNB (5,5'- Dithiobis (2-nitrobenzoic acid)) method.** DTNB (50  $\mu\text{L}$  of 0.4 mg/mL solution) was mixed with 250  $\mu\text{L}$  aliquots of different concentrations of Hcys directly in phosphate buffer (pH= 8.0). After incubation for 15 min at room temperature, UV spectra for each sample were recorded from 350 to 600 nm, and a standard curve based on absorbance intensity at 412 nm was obtained as a reference.

## 2. Supplementary Figures

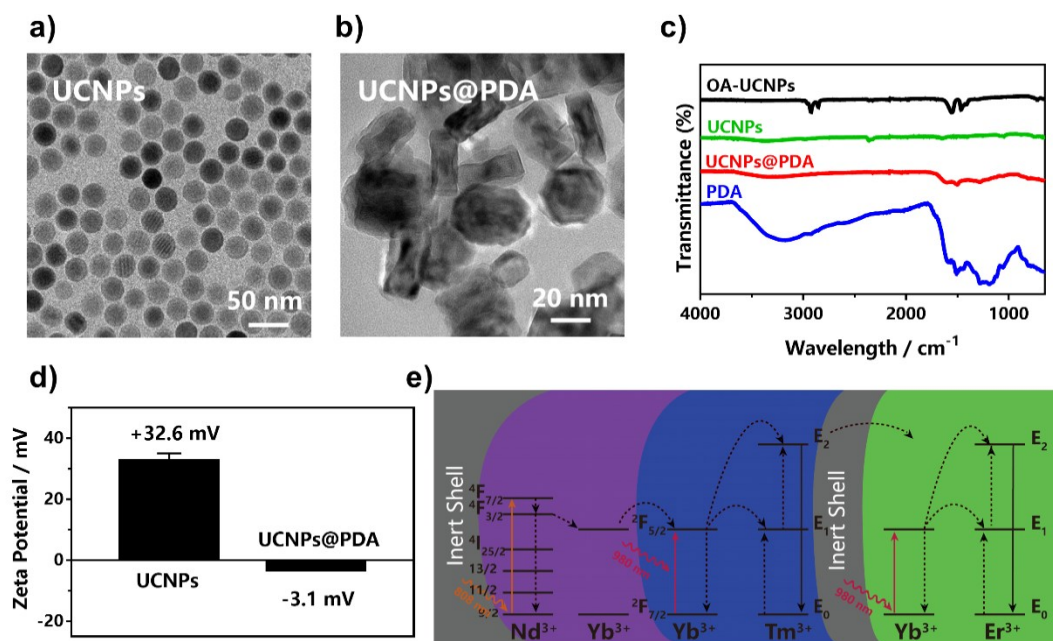

**Figure S1.** TEM image of (a) UCNPs and (b) UCNPs@PDA. (c) FTIR spectrum of the OA-UCNPs (black line), ligand-free UCNPs (green line), UCNPs@PDA (red line) and PDA (blue line). (d) Zeta potential diagram of UCNPs and UCNPs@PDA. (e) Illustration of the composition of the UCNPs and its energy migration.

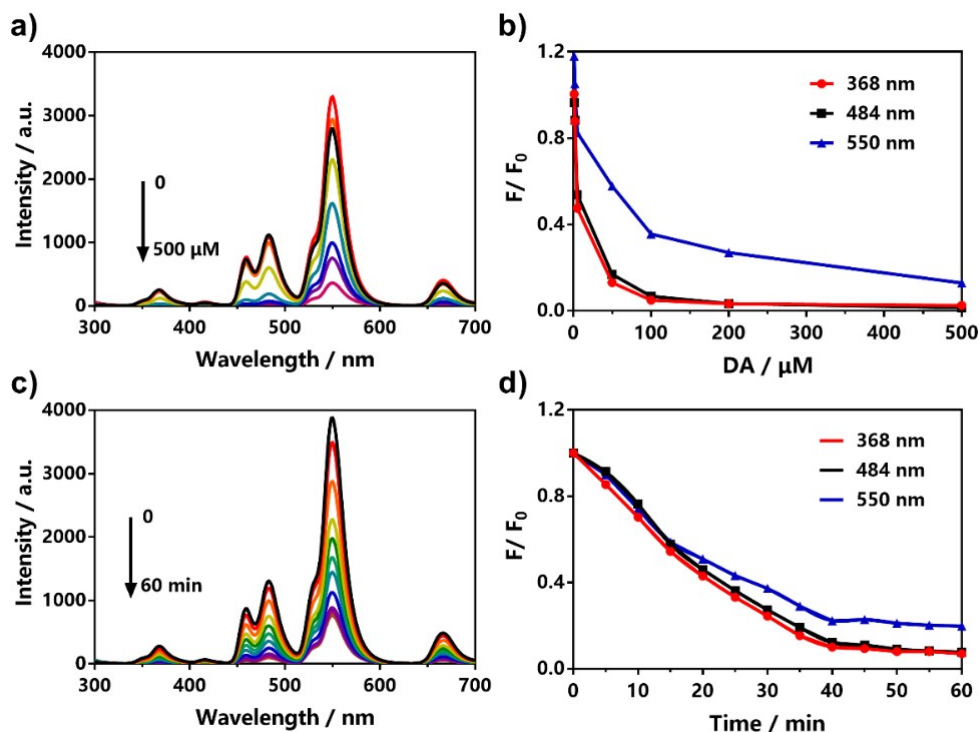

**Figure S2.** (a) Upconversion emission spectra of UCNPs@PDA correlated with DA of varied concentrations (0, 1, 2, 5, 50, 100, 200 and 500  $\mu\text{M}$ ), and (b) corresponding plot of emission peaks at 368 nm, 484 nm, and 550 nm. (c) Upconversion emission spectra of UCNPs@PDA challenged with 60 min.

100  $\mu\text{M}$  DA within 1 h, and (d) corresponding plot of emission peaks at 368 nm, 484 nm, and 550 nm. Where  $F$  and  $F_0$  are the fluorescence intensity of the UCNPs before and after additions of DA.

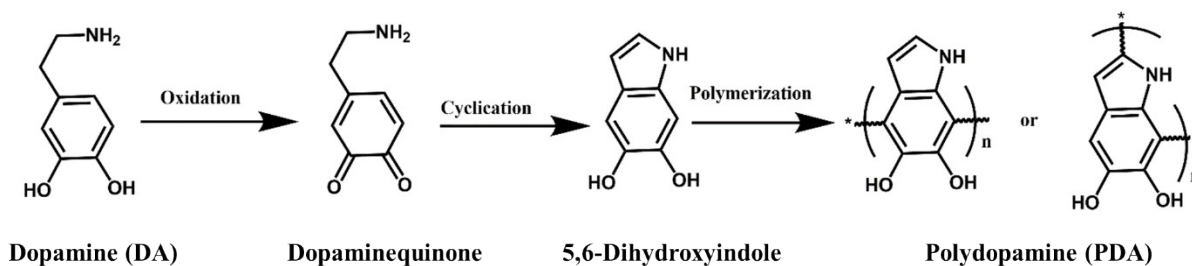

**Figure S3.** The chemical reaction process of polydopamine formation.

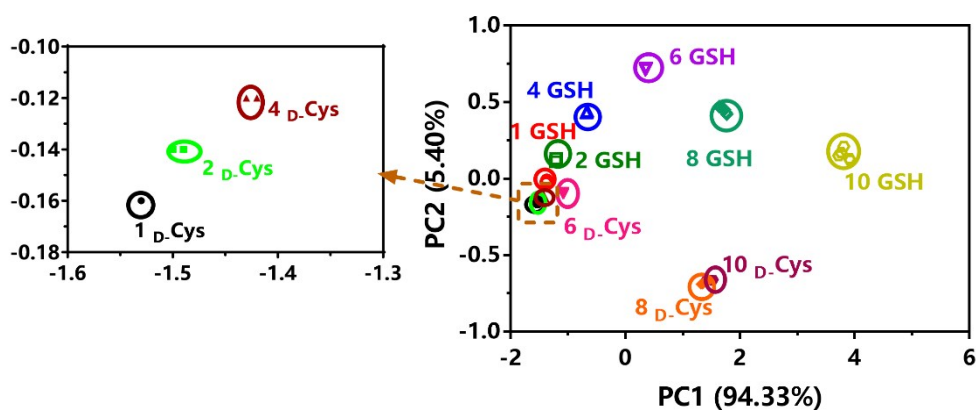

**Figure S4.** Canonical score plots derived from upconversion fluorescent  $F/F_0$  patterns of the single-component UCNPs@PDA nanoprobe toward various concentrations of  $D.Cys$  and GSH.

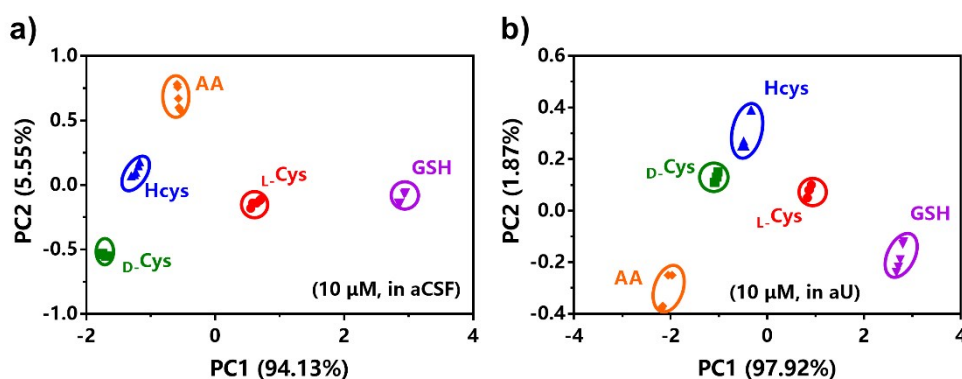

**Figure S5.** Canonical score plots derived from upconversion fluorescent patterns of the presented nanoprobe toward antioxidants indicated in artificial cerebrospinal fluid (a) and urine (b).

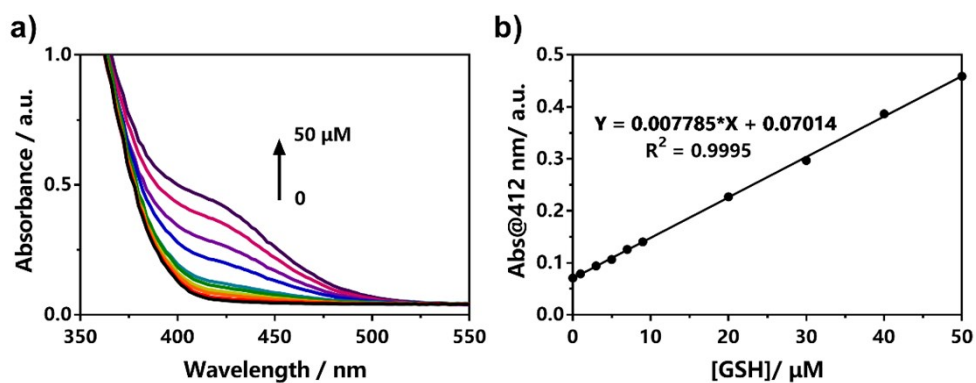

**Figure S6.** (a) UV spectra of the DNTB method for detection of GSH. (b) Plot of absorbance at 412 nm as a function of the increasing concentrations of GSH.

### 3. References

- 1 V. Ranc, Z. Markova, M. Haiduch, R. Prucek, L. Kvitek, J. Kaslik, K. Safarova and R. Zboril, *Anal. Chem.*, 2014, **86**, 2939–2946
- 2 X. Gu, H. Wang, Z.D. Schultz and J.P. Camden, *Anal. Chem.*, 2016, **88**, 7191–7197.
